# Supplementary material for: Urinary metabolomics reveals glycemic and coffee associated signatures of thyroid function in two population-based cohorts
Source: PubMed Central journal article supplement (PMC5333857; doi:10.1371/journal.pone.0173078), 2017-03-02
Supplement: pone.0173078.s001.pdf [file pone.0173078.s001.pdf]

**S1 Table. Associations of urinary baseline metabolites with risk of hypothyroidism and hyperthyroidism in Inter99.**

| Metabolite           | Hypothyroidism                 |       |      | Hyperthyroidism                |      |      |
|----------------------|--------------------------------|-------|------|--------------------------------|------|------|
|                      | OR (95%-CI)<br>per SD increase | P     | FDR  | OR (95%-CI)<br>per SD increase | P    | FDR  |
| Acetic Acid          | 0.91 (0.71; 1.21)              | 0.56  | 0.94 | 1.01 (0.81; 1.31)              | 0.82 | 0.94 |
| Alanine              | 0.71 (0.51; 0.91)              | 0.02  | 0.18 | 1.21 (0.91; 1.51)              | 0.24 | 0.83 |
| Betaine              | 1.01 (0.91; 1.31)              | 0.65  | 0.94 | 0.61 (0.21; 1.81)              | 0.37 | 0.94 |
| Citric Acid          | 1.11 (0.81; 1.31)              | 0.69  | 0.94 | 1.01 (0.71; 1.41)              | 0.86 | 0.94 |
| Creatinine           | 1.01 (0.81; 1.31)              | 0.94  | 0.94 | 1.11 (0.81; 1.51)              | 0.68 | 0.94 |
| Creatine             | 0.91 (0.71; 1.21)              | 0.44  | 0.94 | 1.01 (0.81; 1.41)              | 0.89 | 0.94 |
| Dimethylamine        | 1.01 (0.91; 1.31)              | 0.68  | 0.94 | 1.01 (0.71; 1.41)              | 0.92 | 0.94 |
| Formic Acid          | 1.11 (0.91; 1.41)              | 0.32  | 0.90 | 1.01 (0.81; 1.41)              | 0.79 | 0.94 |
| D-Glucose-beta       | 0.91 (0.51; 1.71)              | 0.74  | 0.94 | 0.91 (0.51; 1.61)              | 0.73 | 0.94 |
| Glycine              | 0.61 (0.31; 1.00)              | 0.03  | 0.24 | 1.11 (0.91; 1.31)              | 0.49 | 0.94 |
| Hippuric Acid        | 1.31 (1.11; 1.51)              | <0.01 | 0.07 | 0.81 (0.51; 1.11)              | 0.18 | 0.70 |
| Lactic Acid          | 0.51 (0.31; 0.81)              | 0.01  | 0.07 | 1.11 (1.01; 1.31)              | 0.15 | 0.69 |
| N,N-Dimethylglycine  | 0.81 (0.61; 1.11)              | 0.16  | 0.69 | 0.81 (0.61; 1.21)              | 0.27 | 0.85 |
| Succinic Acid        | 1.11 (0.91; 1.41)              | 0.39  | 0.94 | 1.01 (0.71; 1.41)              | 0.92 | 0.94 |
| Trigonelline         | 1.41 (1.11; 1.71)              | <0.01 | 0.03 | 0.71 (0.51; 1.11)              | 0.10 | 0.55 |
| Trimethylamine       | 0.91 (0.71; 1.21)              | 0.42  | 0.94 | 1.01 (0.71; 1.31)              | 0.80 | 0.94 |
| 1-Methylnicotinamide | 1.01 (0.91; 1.21)              | 0.64  | 0.94 | 1.01 (0.51; 1.91)              | 0.90 | 0.94 |

FDR = false discovery rate. OR = odds ratio; CI = confidence interval; SD = standard deviation. Multinomial logistic regression model (reference group = euthyroid) were adjusted for age, sex, body-mass-index, HbA1c, LDL cholesterol and systolic blood pressure.
