# Supplementary material for: Urinary metabolomics reveals glycemic and coffee associated signatures of thyroid function in two population-based cohorts
Source: PubMed Central journal article supplement (PMC5333857; doi:10.1371/journal.pone.0173078), 2017-03-02
Supplement: pone.0173078.s002.pdf [file pone.0173078.s002.pdf]

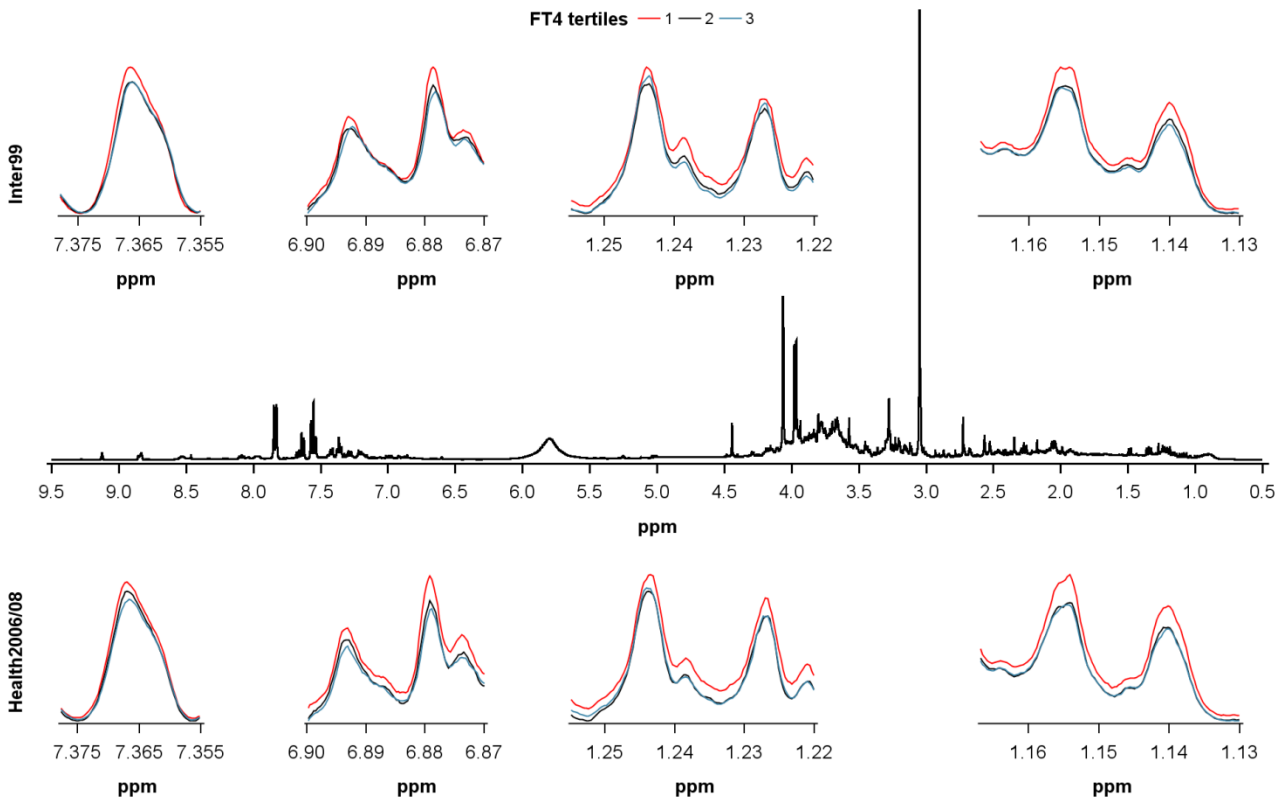

**S1 Figure. NMR spectra by free thyroxine (FT4) levels.** Black spectrum: exemplary urinary median nuclear magnetic resonance spectrum based on 5000 buckets. Median spectrum for selected ppm regions by FT4 groups in Inter99 (above the exemplary spectrum) and Health2006/08 (below the exemplary spectrum).
